# Supplementary material for: EUCAST Ibrexafungerp MICs and Wild-Type Upper Limits for Contemporary Danish Yeast Isolates
Source: MDPI journal article supplement (doi:10.3390/jof8101106), 2022-10-20
Supplement: s1 [file s1]

**Table S1.** Ibrexafungerp EUCAST MICs of rare yeast.

|                                       |    | Ibrexafungerp MICs (mg/L) |      |       |      |     |   |    |   |   |    |
|---------------------------------------|----|---------------------------|------|-------|------|-----|---|----|---|---|----|
|                                       | N  | 0.03                      | 0.06 | 0.125 | 0.25 | 0.5 | 1 | 2  | 4 | 8 | >8 |
| Candida species                       |    |                           |      |       |      |     |   |    |   |   |    |
| C. metapsilosis                       | 1  |                           |      | 1     |      |     |   |    |   |   |    |
| C. orthopsilosis                      | 8  |                           |      | 1     | 6    | 1   |   |    |   |   |    |
| C. kefyr                              | 8  |                           |      | 1     | 5    | 2   |   |    |   |   |    |
| C. lambica                            | 1  |                           |      |       | 1    |     |   |    |   |   |    |
| C. norvegensis                        | 6  |                           |      |       | 6    |     |   |    |   |   |    |
| C. pelliculosa                        | 2  |                           |      |       | 2    |     |   |    |   |   |    |
| C. utilis                             | 1  |                           |      |       | 1    |     |   |    |   |   |    |
| C. guilliermondii                     | 11 |                           |      |       |      | 1   | 9 | 1  |   |   |    |
| C. intermedia                         | 1  |                           |      |       |      | 1   |   |    |   |   |    |
| C. stellimalicola                     | 1  |                           |      |       |      | 1   |   |    |   |   |    |
| C. auris                              | 2  |                           |      |       |      | 1   | 1 |    |   |   |    |
| C. fermentati                         | 4  |                           |      |       |      |     | 4 |    |   |   |    |
| C. inconspicua                        | 1  |                           |      |       |      |     | 1 |    |   |   |    |
| C. lipolytica                         | 1  |                           |      |       |      |     | 1 |    |   |   |    |
| C. melibiosica                        | 1  |                           |      |       |      |     | 1 |    |   |   |    |
| C. pulcherrima                        | 1  |                           |      |       |      |     | 1 |    |   |   |    |
| C. sorbosivorans                      | 1  |                           |      |       |      |     | 1 |    |   |   |    |
| C. lusitaniae                         | 19 |                           |      |       |      |     | 7 | 11 | 1 |   |    |
| C. pararugosa                         | 1  |                           |      |       |      |     |   |    |   | 1 |    |
| Other yeast                           |    |                           |      |       |      |     |   |    |   |   |    |
| Arxula adeninivorans                  | 1  | 1                         |      |       |      |     |   |    |   |   |    |
| Saccharomyces cerevisiae              | 30 |                           |      | 1     | 10   | 19  |   |    |   |   |    |
| Lodderomyces elongisporus             | 1  |                           |      |       | 1    |     |   |    |   |   |    |
| Wickerhamomyces anomalus              | 2  |                           |      |       | 2    |     |   |    |   |   |    |
| Pichia manshurica                     | 1  |                           |      |       |      | 1   |   |    |   |   |    |
| Wickerhamomyces onychis               | 1  |                           |      |       |      | 1   |   |    |   |   |    |
| Yarrowia lipolytica                   | 1  |                           |      |       |      | 1   |   |    |   |   |    |
| Kodamaea ohmeri                       | 1  |                           |      |       |      |     | 1 |    |   |   |    |
| Magnusiomyces capitatus               | 5  |                           |      |       |      |     | 2 | 1  |   | 2 |    |
| Wickerhamomyces species               | 1  |                           |      |       |      |     | 1 |    |   |   |    |
| Cryptococcus neoformans spp. complex* | 7  |                           |      |       |      |     |   | 5  | 2 |   |    |
| Microsporium audouinii                | 3  |                           |      |       |      |     |   | 2  | 1 |   |    |
| Trichosporon asahii                   | 4  |                           |      |       |      |     |   | 1  | 1 | 2 |    |
| Geotrichum candidum                   | 5  |                           |      |       |      |     |   |    | 1 | 2 | 2  |
| Rhodotorula mucilaginosa              | 3  |                           |      |       |      |     |   |    | 1 | 1 | 1  |
| Exophiala dermatitidis                | 1  |                           |      |       |      |     |   |    |   | 1 |    |
| Lachancea thermotolerans              | 1  |                           |      |       |      |     |   |    |   | 1 |    |
| Trichosporon dermatis                 | 2  |                           |      |       |      |     |   |    |   | 2 |    |
| Geotrichum capitatum                  | 2  |                           |      |       |      |     |   |    |   | 1 | 1  |
| Geotrichum species                    | 2  |                           |      |       |      |     |   |    |   | 1 | 1  |
| Geotrichum silvicola                  | 1  |                           |      |       |      |     |   |    |   |   | 1  |

\*Six *Cryptococcus neoformans* and one *Cryptococcus neoformans* spp. complex.
