# Supplementary material for: EUCAST Ibrexafungerp MICs and Wild-Type Upper Limits for Contemporary Danish Yeast Isolates
Source: MDPI journal article supplement (doi:10.3390/jof8101106), 2022-10-20

**Figure S1.** Growth curve examples for isolates defined as ibrexafungerp wild-type and non-wild-type adopting the WT-UL 97.5%

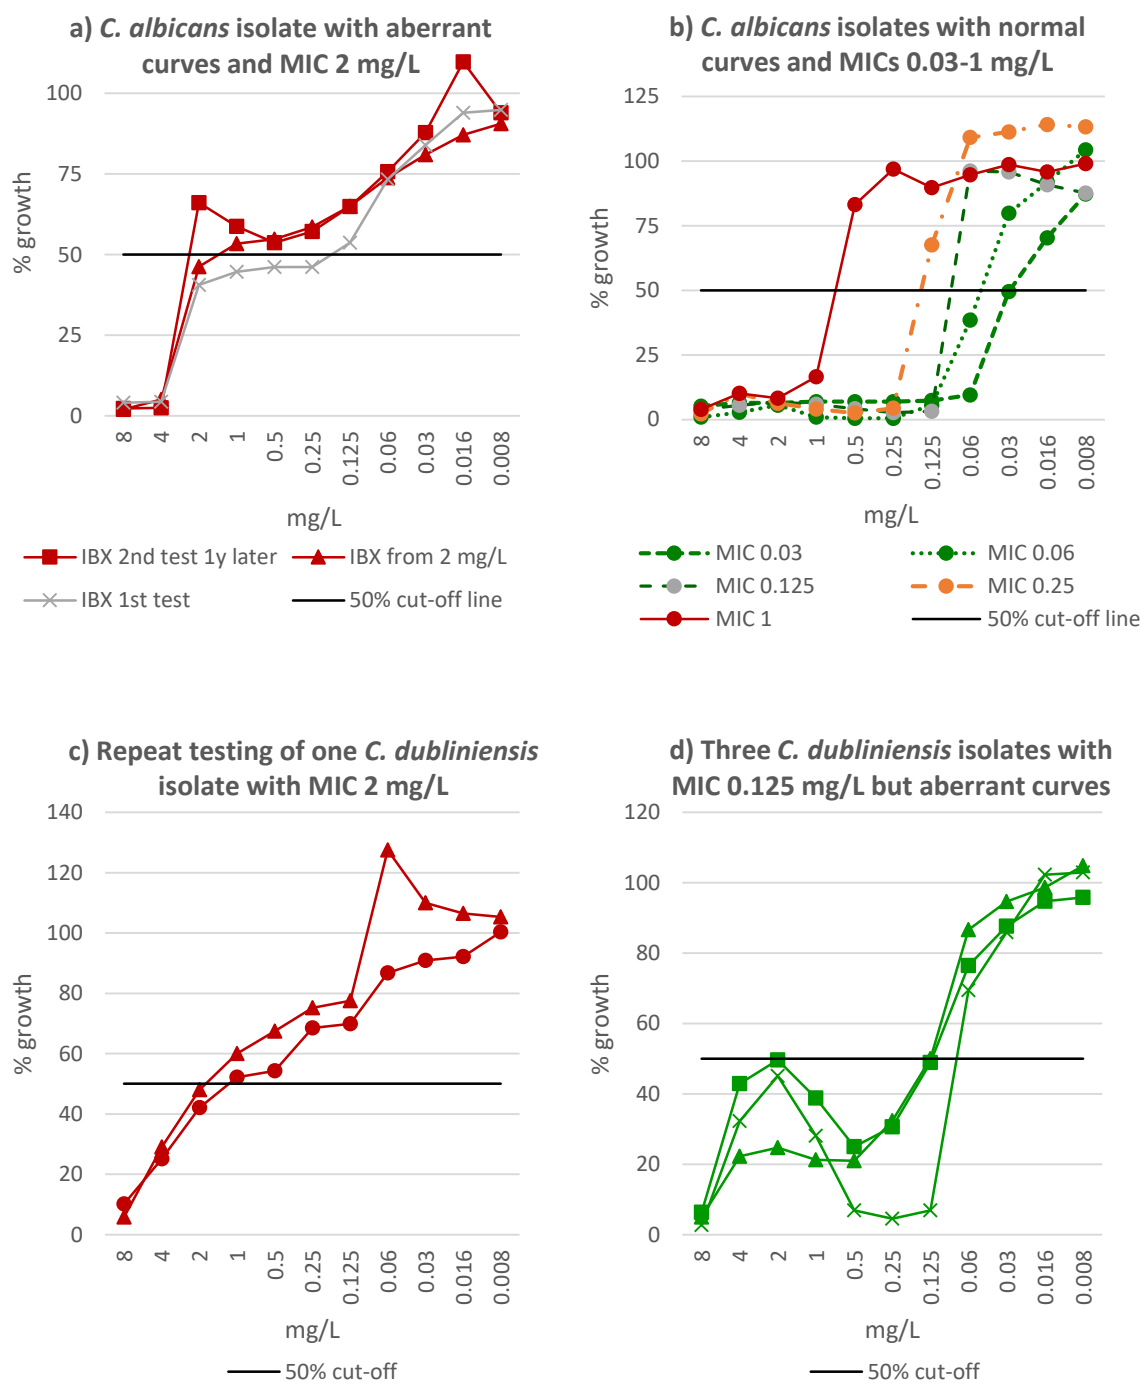

e) *C. parapsilosis* isolates with aberrant curves and MIC 4-8 mg/L

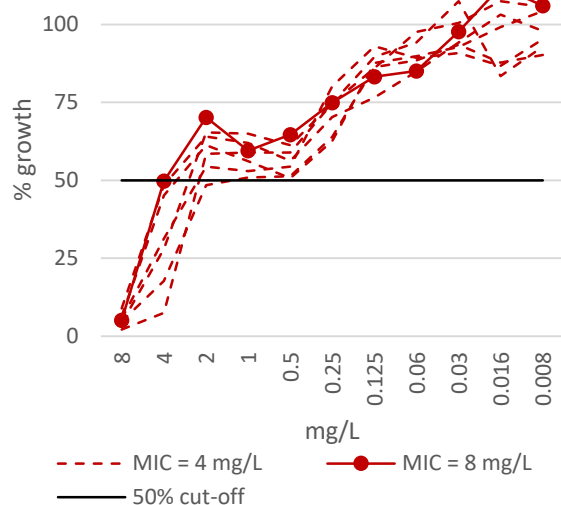

f) *C. parapsilosis* QC strain ATCC 22019 tested 16 times

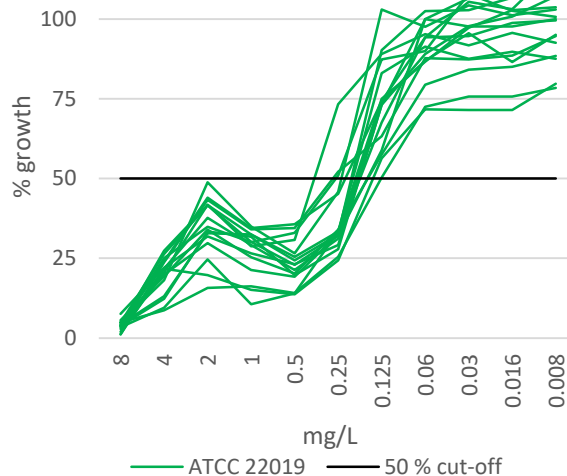

g) *C. tropicalis* isolates with MIC 4-8 mg/L

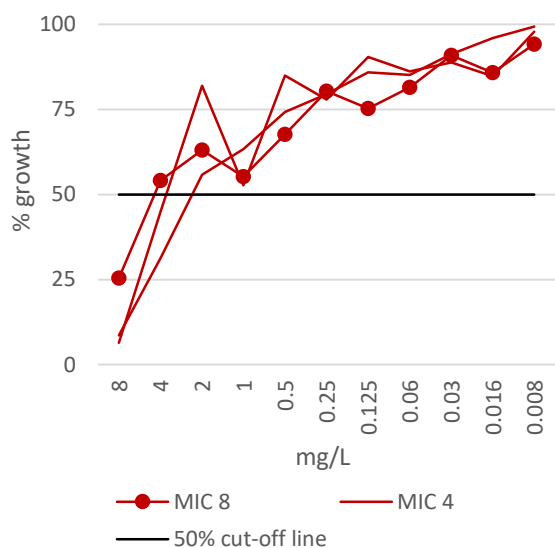

h) Three *C. tropicalis* isolates with aberrant curves and three random comparators

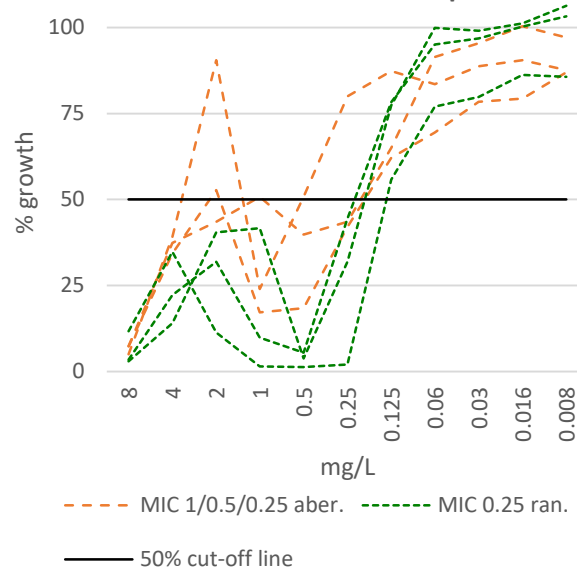

Supplement: s1 [file s1]
